# Supplementary material
Source: PubMed Central journal article supplement (PMC3162411)
Supplement: supp_M111.263442_jbc.M111.263442-2.pdf [file supp_M111.263442_jbc.M111.263442-2.pdf]

**Supplementary Table 2****Effect of S1P<sub>2</sub> plasmid dilution of apparent E<sub>max</sub> and EC<sub>50</sub>**

EC<sub>50</sub> values and E<sub>max</sub> values were determined in RH7777 cells transiently transfected with Gαq protein plus different ratios of FLAG-S1P<sub>2</sub> to pcDNA3.1 empty vector. E<sub>max</sub> values are normalized to the maximal Ca<sup>2+</sup> response in cells transfected with 100% FLAG-S1P<sub>2</sub> plasmid. *na*, not activated.

| S1P <sub>2</sub> :Vector<br>(μg S1P <sub>2</sub> ) | EC <sub>50</sub> (nM) | Relative<br>E <sub>max</sub> | Percentage of<br>anti-FLAG<br>stained cells |
|----------------------------------------------------|-----------------------|------------------------------|---------------------------------------------|
| 1:0 (6 μg)                                         | 17                    | 100%                         | 18%                                         |
| 2:1 (4 μg)                                         | 16                    | 99%                          | 15%                                         |
| 1:1 (3 μg)                                         | 13                    | 98%                          | 13%                                         |
| 1:2 (2 μg)                                         | 13                    | 104%                         | 12%                                         |
| 1:5 (1 μg)                                         | 11                    | 99%                          | 8%                                          |
| 0:1 (0 μg)                                         | <i>na</i>             | <i>na</i>                    | 2%                                          |
