# Supplementary material
Source: PubMed Central journal article supplement (PMC3162411)
Supplement: supp_M111.263442_jbc.M111.263442-3.pdf [file supp_M111.263442_jbc.M111.263442-3.pdf]

**Supplementary Table 3****Surface expression of S1P<sub>1</sub> and S1P<sub>2</sub> chimeric receptors**

Surface expression of FLAG-tagged receptor constructs was determined in non-permeabilized transiently transfected HTC4 cells by anti-FLAG epitope flow cytometric analysis.

| Receptor construct                        | FLAG % | Receptor construct                                  | FLAG % |
|-------------------------------------------|--------|-----------------------------------------------------|--------|
| Vector                                    | 2      | S1P <sub>2</sub> ( <i>a,b,c,d</i> ) <sup>S1P1</sup> | 14     |
| S1P <sub>1</sub> -WT                      | 13     | S1P <sub>2</sub> ( <i>a</i> ) <sup>S1P1</sup>       | 18     |
| S1P <sub>2</sub> -WT                      | 18     | S1P <sub>2</sub> ( <i>b</i> ) <sup>S1P1</sup>       | 19     |
| S1P <sub>2</sub> (NT-TM1) <sup>S1P1</sup> | 15     | S1P <sub>2</sub> ( <i>c</i> ) <sup>S1P1</sup>       | 21     |
| S1P <sub>2</sub> (NT-IC1) <sup>S1P1</sup> | 14     | S1P <sub>2</sub> ( <i>d</i> ) <sup>S1P1</sup>       | 27     |
| S1P <sub>2</sub> (NT-TM2) <sup>S1P1</sup> | 14     | S1P <sub>2</sub> ( <i>a,b</i> ) <sup>S1P1</sup>     | 16     |
| S1P <sub>2</sub> (NT-EC1) <sup>S1P1</sup> | 12     | S1P <sub>2</sub> ( <i>c,d</i> ) <sup>S1P1</sup>     | 28     |
| S1P <sub>2</sub> (NT-TM3) <sup>S1P1</sup> | 16     | S1P <sub>2</sub> ( <i>b,d</i> ) <sup>S1P1</sup>     | 25     |
| S1P <sub>2</sub> (NT-IC2) <sup>S1P1</sup> | 19     | S1P <sub>2</sub> ( <i>b,c</i> ) <sup>S1P1</sup>     | 15     |
| S1P <sub>2</sub> (NT-TM5) <sup>S1P1</sup> | 18     | S1P <sub>2</sub> ( <i>b,c,d</i> ) <sup>S1P1</sup>   | 20     |
| S1P <sub>1</sub> (TM6-CT) <sup>S1P2</sup> | 15     | S1P <sub>2</sub> ( <i>a,c,d</i> ) <sup>S1P1</sup>   | 13     |
| S1P <sub>1</sub> (NT-TM1) <sup>S1P2</sup> | 12     | S1P <sub>2</sub> ( <i>a,b,d</i> ) <sup>S1P1</sup>   | 14     |
| S1P <sub>2</sub> (TM2-CT) <sup>S1P1</sup> | 4      | S1P <sub>2</sub> ( <i>a,b,c</i> ) <sup>S1P1</sup>   | 20     |
| S1P <sub>2</sub> (EC1-CT) <sup>S1P1</sup> | 2      | S1P <sub>1</sub> ( <i>a,b,c,d</i> ) <sup>S1P2</sup> | 12     |
| S1P <sub>2</sub> (TM3-CT) <sup>S1P1</sup> | 2      | S1P <sub>1</sub> ( <i>a,c,d</i> ) <sup>S1P2</sup>   | 10     |
| S1P <sub>2</sub> (IC2-CT) <sup>S1P1</sup> | 3      | S1P <sub>1</sub> ( <i>a,b,c</i> ) <sup>S1P2</sup>   | 13     |
| S1P <sub>2</sub> (TM4-CT) <sup>S1P1</sup> | 1      | S1P <sub>1</sub> ( <i>a</i> ) <sup>S1P2</sup>       | 9      |
| S1P <sub>2</sub> (IC3-CT) <sup>S1P1</sup> | 2      | S1P <sub>1</sub> ( <i>b</i> ) <sup>S1P2</sup>       | 12     |
| S1P <sub>2</sub> (TM6-CT) <sup>S1P1</sup> | 2      |                                                     |        |
