# Supplementary material
Source: PubMed Central journal article supplement (PMC3162411)
Supplement: supp_M111.263442_jbc.M111.263442-4.pdf [file supp_M111.263442_jbc.M111.263442-4.pdf]

---

**Supplementary Table 4****Alignment of IC1 and TM2 sequences in S1P<sub>1-5</sub>**

Residues in bold represent residues identical to S1P<sub>1</sub> sequence but different from S1P<sub>2</sub> sequence in motifs *a*, *b*, *c*, or *d*.

---

| Receptor subtype | IC1 and TM2 sequence                                                                                                                                                                                                                                                                                                                                                       |
|------------------|----------------------------------------------------------------------------------------------------------------------------------------------------------------------------------------------------------------------------------------------------------------------------------------------------------------------------------------------------------------------------|
| S1P <sub>1</sub> | <u>W</u> <b>K</b> <u>T</u> <b>K</b> <u>K</u> <u>F</u> <u>H</u> <u>R</u> <u>P</u> <u>M</u> <u>Y</u> <u>Y</u> <b>F</b> <u>I</u> <u>G</u> <u>N</u> <u>L</u> <u>A</u> <u>L</u> <u>S</u> <u>D</u> <u>L</u> <u>L</u> <u>A</u> <u>G</u> <u>V</u> <u>A</u> <u>Y</u> <u>T</u> <u>A</u> <u>N</u> <u>L</u> <u>L</u> <u>L</u> <u>S</u> <u>G</u><br><i>a</i> <i>b</i> <i>c</i> <i>d</i> |
| S1P <sub>2</sub> | <u>A</u> <u>R</u> <u>N</u> <u>S</u> <u>K</u> <u>F</u> <u>H</u> <u>S</u> <u>A</u> <u>M</u> <u>Y</u> <u>L</u> <u>F</u> <u>L</u> <u>G</u> <u>N</u> <u>L</u> <u>A</u> <u>A</u> <u>S</u> <u>D</u> <u>L</u> <u>L</u> <u>A</u> <u>G</u> <u>V</u> <u>A</u> <u>F</u> <u>V</u> <u>A</u> <u>N</u> <u>T</u> <u>L</u> <u>L</u> <u>S</u> <u>G</u>                                        |
| S1P <sub>3</sub> | <u>W</u> <b>K</b> <u>N</u> <u>N</u> <u>K</u> <u>F</u> <u>H</u> <u>N</u> <u>R</u> <u>M</u> <u>Y</u> <u>F</u> <b>F</b> <u>I</u> <u>G</u> <u>N</u> <u>L</u> <u>A</u> <u>L</u> <u>C</u> <u>D</u> <u>L</u> <u>L</u> <u>A</u> <u>G</u> <u>I</u> <u>A</u> <u>Y</u> <u>K</u> <u>V</u> <u>N</u> <u>I</u> <u>L</u> <u>M</u> <u>S</u> <u>G</u>                                        |
| S1P <sub>4</sub> | <u>T</u> <u>S</u> <u>H</u> <u>M</u> <u>R</u> <u>S</u> <u>R</u> <u>R</u> <u>W</u> <u>V</u> <u>Y</u> <b>Y</b> <u>C</u> <u>L</u> <u>V</u> <u>N</u> <u>I</u> <u>T</u> <u>L</u> <u>S</u> <u>D</u> <u>L</u> <u>L</u> <u>T</u> <u>G</u> <u>A</u> <u>A</u> <u>Y</u> <u>L</u> <u>A</u> <u>N</u> <u>V</u> <u>L</u> <u>L</u> <u>S</u> <u>G</u>                                        |
| S1P <sub>5</sub> | <u>G</u> <u>R</u> <u>H</u> <u>P</u> <u>R</u> <u>F</u> <u>H</u> <u>A</u> <u>P</u> <u>M</u> <u>F</u> <u>L</u> <u>L</u> <u>L</u> <u>G</u> <u>S</u> <u>L</u> <u>T</u> <u>L</u> <u>S</u> <u>D</u> <u>L</u> <u>L</u> <u>A</u> <u>G</u> <u>A</u> <u>A</u> <u>Y</u> <u>A</u> <u>A</u> <u>N</u> <u>I</u> <u>L</u> <u>L</u> <u>S</u> <u>G</u>                                        |

---
